# Supplementary material
Source: PubMed Central journal article supplement (PMC7714813)
Supplement: 13244_2020_945_MOESM1_ESM.pdf [file 13244_2020_945_MOESM1_ESM.pdf]

## What is the identity and role of the radiologist in 2020?

Dear ESR member,

The ESR Board of Directors proposes a survey to explore the opinions of the ESR full radiologist members concerning their perceptions of the current identity and role of the radiologist.

Two basic principles can be agreed:

1. The radiologist is and will remain the responsible medical professional with regards to medical imaging diagnostics and interventional procedures performed under the auspices of radiology departments.
2. Excellence in patient care and patient safety are central to our role.

Accepting these over-arching principles, we recognise that our profession evolves as technology and healthcare evolve, giving us opportunities, as well as perhaps raising concerns in relation to our role in patient care.

Here we explore our relationship and communications with professional colleagues and patients. This may change significantly as we move into the world of instant messaging, patient portals and patient involvement.

The interaction with clinical colleagues may be challenged in relation to turf battles and whether we see ourselves (and are seen) as technicians or as clinicians. Imaging and imaging-guided procedures are integral to medical education, research and healthcare management. What is our role in these important areas to ensure the development of high-quality services and care?

Delegation of some aspects of work to allied healthcare professionals has become part of teamwork and radiology is not immune. What are radiologists' opinions concerning skill mix in radiology?

This survey attempts to explore radiologists' opinions in relation to their identity with four main sections:

1. About you, your clinical role and your training.
2. About your role in patient and professional relationships.
3. About your role in education, research and management.
4. About delegation: what happens in your department and what is your opinion?

This is an in-depth survey and as such we understand it is somewhat longer, but seeing the importance of this topic, we kindly ask you to please take the time and provide us with your valuable input. The survey should take approximately 25-30 minutes and its results will be discussed during the ESR National Societies Committee meeting which will be held at the ECR 2020.

In order to express our appreciation for your support, we will offer 10 free registrations to ECR 2020 in

**a prize draw.**

**The winners will be selected randomly among those who completed the survey (at least mandatory sections).**

**Many thanks for your help!**

**Kind regards,  
Andrea Rockall  
Chairperson of the ESR National Societies Committee**

What is the identity and role of the radiologist in 2020?

About you, your clinical role and your training

1. If you would like to participate in the prize draw (free ECR 2020 registration), please let us know your email address.

\* 2. In which country do you practice?

\* 3. How many years have you worked as an accredited radiologist (after completion of specialist training)?

- 0-5  16-20  
 6-10  >20  
 11-15

\* 4. What is your age?

- 25-34 years  
 35-44 years  
 45-54 years  
 55-64 years  
 Age 65 or older

5. What is your gender?

- Male
- Female
- Prefer not to say

\* 6. How would you best describe your primary practice setting?

|                          | Academic teaching hospital | Non-university or district general hospital with teaching | District general hospital (i.e. smaller/community hospital) without teaching | Private practice      | Retired               |
|--------------------------|----------------------------|-----------------------------------------------------------|------------------------------------------------------------------------------|-----------------------|-----------------------|
| Primary practice setting | <input type="radio"/>      | <input type="radio"/>                                     | <input type="radio"/>                                                        | <input type="radio"/> | <input type="radio"/> |

\* 7. How would you best describe your secondary practice setting?

|                             | Not applicable        | Academic teaching hospital | Non-university or district general hospital with teaching | District general hospital without teaching | Private practice      | Retired               |
|-----------------------------|-----------------------|----------------------------|-----------------------------------------------------------|--------------------------------------------|-----------------------|-----------------------|
| Additional practice setting | <input type="radio"/> | <input type="radio"/>      | <input type="radio"/>                                     | <input type="radio"/>                      | <input type="radio"/> | <input type="radio"/> |

\* 8. Does your practice setting offer:

(flexible working: could include early/late starts/ rotating days working)

(part-time: less than standard departmental full-time contract)

|                             | Yes                   | No                    | Don't know            |
|-----------------------------|-----------------------|-----------------------|-----------------------|
| Flexible working for men    | <input type="radio"/> | <input type="radio"/> | <input type="radio"/> |
| Flexible working for women  | <input type="radio"/> | <input type="radio"/> | <input type="radio"/> |
| Part-time working for men   | <input type="radio"/> | <input type="radio"/> | <input type="radio"/> |
| Part-time working for women | <input type="radio"/> | <input type="radio"/> | <input type="radio"/> |

\* 9. How would you best describe the imaging modalities of your own personal practice?

|                                            | None                  | Low                   | Moderate              | High                  | Very High             |
|--------------------------------------------|-----------------------|-----------------------|-----------------------|-----------------------|-----------------------|
| Plain film                                 | <input type="radio"/> | <input type="radio"/> | <input type="radio"/> | <input type="radio"/> | <input type="radio"/> |
| Mammography                                | <input type="radio"/> | <input type="radio"/> | <input type="radio"/> | <input type="radio"/> | <input type="radio"/> |
| Ultrasound                                 | <input type="radio"/> | <input type="radio"/> | <input type="radio"/> | <input type="radio"/> | <input type="radio"/> |
| Radiographic screening                     | <input type="radio"/> | <input type="radio"/> | <input type="radio"/> | <input type="radio"/> | <input type="radio"/> |
| CT                                         | <input type="radio"/> | <input type="radio"/> | <input type="radio"/> | <input type="radio"/> | <input type="radio"/> |
| MRI                                        | <input type="radio"/> | <input type="radio"/> | <input type="radio"/> | <input type="radio"/> | <input type="radio"/> |
| Nuclear medicine                           | <input type="radio"/> | <input type="radio"/> | <input type="radio"/> | <input type="radio"/> | <input type="radio"/> |
| Interventional procedures (general)        | <input type="radio"/> | <input type="radio"/> | <input type="radio"/> | <input type="radio"/> | <input type="radio"/> |
| Interventional procedures (sub-specialist) | <input type="radio"/> | <input type="radio"/> | <input type="radio"/> | <input type="radio"/> | <input type="radio"/> |

\* 10. How would you best describe your own "organ-based or clinical" areas of practice?

|                           | None                  | Low                   | Moderate              | High                  | Very High             |
|---------------------------|-----------------------|-----------------------|-----------------------|-----------------------|-----------------------|
| General                   | <input type="radio"/> | <input type="radio"/> | <input type="radio"/> | <input type="radio"/> | <input type="radio"/> |
| Neuro                     | <input type="radio"/> | <input type="radio"/> | <input type="radio"/> | <input type="radio"/> | <input type="radio"/> |
| Head and Neck             | <input type="radio"/> | <input type="radio"/> | <input type="radio"/> | <input type="radio"/> | <input type="radio"/> |
| Pulmonary                 | <input type="radio"/> | <input type="radio"/> | <input type="radio"/> | <input type="radio"/> | <input type="radio"/> |
| Cardiac                   | <input type="radio"/> | <input type="radio"/> | <input type="radio"/> | <input type="radio"/> | <input type="radio"/> |
| Breast                    | <input type="radio"/> | <input type="radio"/> | <input type="radio"/> | <input type="radio"/> | <input type="radio"/> |
| Gastrointestinal          | <input type="radio"/> | <input type="radio"/> | <input type="radio"/> | <input type="radio"/> | <input type="radio"/> |
| Genitourinary             | <input type="radio"/> | <input type="radio"/> | <input type="radio"/> | <input type="radio"/> | <input type="radio"/> |
| Musculoskeletal           | <input type="radio"/> | <input type="radio"/> | <input type="radio"/> | <input type="radio"/> | <input type="radio"/> |
| Paediatric Imaging        | <input type="radio"/> | <input type="radio"/> | <input type="radio"/> | <input type="radio"/> | <input type="radio"/> |
| Oncology imaging          | <input type="radio"/> | <input type="radio"/> | <input type="radio"/> | <input type="radio"/> | <input type="radio"/> |
| Vascular intervention     | <input type="radio"/> | <input type="radio"/> | <input type="radio"/> | <input type="radio"/> | <input type="radio"/> |
| Non-vascular intervention | <input type="radio"/> | <input type="radio"/> | <input type="radio"/> | <input type="radio"/> | <input type="radio"/> |

\* 11. How do you rate your enjoyment of different aspects of your job?

|                                                         | Strongly disagree     | Disagree              | Neutral               | Agree                 | Strongly agree        | Not applicable        |
|---------------------------------------------------------|-----------------------|-----------------------|-----------------------|-----------------------|-----------------------|-----------------------|
| Being a general radiologist                             | <input type="radio"/> | <input type="radio"/> | <input type="radio"/> | <input type="radio"/> | <input type="radio"/> | <input type="radio"/> |
| Being a specialized radiologist                         | <input type="radio"/> | <input type="radio"/> | <input type="radio"/> | <input type="radio"/> | <input type="radio"/> | <input type="radio"/> |
| Interaction with colleagues in the radiology department | <input type="radio"/> | <input type="radio"/> | <input type="radio"/> | <input type="radio"/> | <input type="radio"/> | <input type="radio"/> |
| Interaction with clinical colleagues                    | <input type="radio"/> | <input type="radio"/> | <input type="radio"/> | <input type="radio"/> | <input type="radio"/> | <input type="radio"/> |
| Involvement in multidisciplinary meetings/tumour board  | <input type="radio"/> | <input type="radio"/> | <input type="radio"/> | <input type="radio"/> | <input type="radio"/> | <input type="radio"/> |
| Interaction with patients                               | <input type="radio"/> | <input type="radio"/> | <input type="radio"/> | <input type="radio"/> | <input type="radio"/> | <input type="radio"/> |
| Teaching                                                | <input type="radio"/> | <input type="radio"/> | <input type="radio"/> | <input type="radio"/> | <input type="radio"/> | <input type="radio"/> |
| Service evaluation and audit                            | <input type="radio"/> | <input type="radio"/> | <input type="radio"/> | <input type="radio"/> | <input type="radio"/> | <input type="radio"/> |
| Performing research                                     | <input type="radio"/> | <input type="radio"/> | <input type="radio"/> | <input type="radio"/> | <input type="radio"/> | <input type="radio"/> |
| Involvement with hospital management                    | <input type="radio"/> | <input type="radio"/> | <input type="radio"/> | <input type="radio"/> | <input type="radio"/> | <input type="radio"/> |

\* 12. What would you wish to change?

|                                      | I would like less     | I would like same     | I would like more     |
|--------------------------------------|-----------------------|-----------------------|-----------------------|
| Level of specialization              | <input type="radio"/> | <input type="radio"/> | <input type="radio"/> |
| Level of workload                    | <input type="radio"/> | <input type="radio"/> | <input type="radio"/> |
| Interaction with clinical colleagues | <input type="radio"/> | <input type="radio"/> | <input type="radio"/> |
| Interaction with patients            | <input type="radio"/> | <input type="radio"/> | <input type="radio"/> |
| Teaching role                        | <input type="radio"/> | <input type="radio"/> | <input type="radio"/> |
| Role as researcher/investigator      | <input type="radio"/> | <input type="radio"/> | <input type="radio"/> |
| Role as a dept/hospital manager      | <input type="radio"/> | <input type="radio"/> | <input type="radio"/> |

\* 13. What is the level of “visibility” of radiologists in your institution? (*Visibility could include for example the recognition of our role in patient management, hospital management or to patient groups*)

- High
- Medium
- Low

\* 14. Are you happy with the level of visibility of radiologists in your institution?

|                  | Yes                   | Medium                | No                    |
|------------------|-----------------------|-----------------------|-----------------------|
| With patients    | <input type="radio"/> | <input type="radio"/> | <input type="radio"/> |
| With clinicians  | <input type="radio"/> | <input type="radio"/> | <input type="radio"/> |
| With institution | <input type="radio"/> | <input type="radio"/> | <input type="radio"/> |

\* 15. In your opinion, is visibility important for our identity in the clinical service e.g. is it important for radiologists to be a visible member of organ-based clinical service?

| Strongly disagree     | Disagree              | Neutral               | Agree                 | Strongly agree        |
|-----------------------|-----------------------|-----------------------|-----------------------|-----------------------|
| <input type="radio"/> | <input type="radio"/> | <input type="radio"/> | <input type="radio"/> | <input type="radio"/> |

\* 16. In your institution:

|                                                                                                | Yes                   | No                    | Not Applicable        | I don't know          |
|------------------------------------------------------------------------------------------------|-----------------------|-----------------------|-----------------------|-----------------------|
| Radiologists' names and/or expertise are listed on the hospital website                        | <input type="radio"/> | <input type="radio"/> | <input type="radio"/> | <input type="radio"/> |
| Radiologists are listed as part of the specialist clinical care teams on website or letterhead | <input type="radio"/> | <input type="radio"/> | <input type="radio"/> | <input type="radio"/> |

What is the identity and role of the radiologist in 2020?

About your training

\* 17. Did you undertake a period of clinical training?

Yes  
 No

What is the identity and role of the radiologist in 2020?

\* 18. At what stage of your training was this done?

As undergraduate (medical student)  
 As clinical resident  
 As radiology resident

\* 19. For how long altogether?

- 3 months
- 6 months
- 9 months
- 12 months
- 12-24 months
- > 24 months

What is the identity and role of the radiologist in 2020?

\* 20. Do you think radiologists should have a mandatory period of non-radiology clinical experience, either before or during radiology training?

- Yes
- No

What is the identity and role of the radiologist in 2020?

\* 21. If yes, for how long?

- 3 to 6 months
- 9 to 12 months
- 12 to 24 months
- > 24 months

What is the identity and role of the radiologist in 2020?

\* 22. Did you undertake a period of clinical or experimental research?

- Yes (formal, e.g. Master's degree or PhD)
- Yes (informal)
- No

What is the identity and role of the radiologist in 2020?

\* 23. If yes, for how long?

- 3 to 6 months
- 9 to 12 months
- 12 to 24 months
- > 24 months

\* 24. Was this a formal requirement of your training programme?

- Yes
- No

What is the identity and role of the radiologist in 2020?

\* 25. Did you undertake a period of subspecialist training/clinical fellowship?

- Yes
- No

What is the identity and role of the radiologist in 2020?

\* 26. If yes, for how long?

- 3 to 6 months
- 9 to 12 months
- 12 to 24 months
- > 24 months

\* 27. Did you undertake the period of subspecialist training/clinical fellowship:

- In your own training department
- In a different department



## What is the identity and role of the radiologist in 2020?

\* 28. In your opinion, do you think it is important for radiologists to have an area of subspecialisation?

- No, general work is most in demand
- Yes

Comment

\* 29. Do you think that having a sub-speciality accreditation improves your identity as a radiologist?

|                             | Strongly disagree     | Disagree              | Neutral               | Agree                 | Strongly agree        |
|-----------------------------|-----------------------|-----------------------|-----------------------|-----------------------|-----------------------|
| To your own perception      | <input type="radio"/> | <input type="radio"/> | <input type="radio"/> | <input type="radio"/> | <input type="radio"/> |
| To your clinical colleagues | <input type="radio"/> | <input type="radio"/> | <input type="radio"/> | <input type="radio"/> | <input type="radio"/> |
| To patients                 | <input type="radio"/> | <input type="radio"/> | <input type="radio"/> | <input type="radio"/> | <input type="radio"/> |

\* 30. Do you have informatics training?

- None
- Basic understanding
- Basic skills and training
- Advanced skills and training, including coding/AI developments

## What is the identity and role of the radiologist in 2020?

### About your role in patient and professional relationships

\* 31. How important do you think the role of the radiologist is in ensuring that patient experience is satisfactory in your department?

| Not important         | Less important        | Moderately important  | Important             | Very important        |
|-----------------------|-----------------------|-----------------------|-----------------------|-----------------------|
| <input type="radio"/> | <input type="radio"/> | <input type="radio"/> | <input type="radio"/> | <input type="radio"/> |

\* 32. Do you think that increasing visibility with patients would change your identity as a radiologist?

|                                                               | Strongly disagree     | Disagree              | Neutral               | Agree                 | Strongly agree        |
|---------------------------------------------------------------|-----------------------|-----------------------|-----------------------|-----------------------|-----------------------|
| I would feel more like a clinician                            | <input type="radio"/> | <input type="radio"/> | <input type="radio"/> | <input type="radio"/> | <input type="radio"/> |
| The patient would see me as a clinical doctor                 | <input type="radio"/> | <input type="radio"/> | <input type="radio"/> | <input type="radio"/> | <input type="radio"/> |
| I would feel more valued as part of the patient care delivery | <input type="radio"/> | <input type="radio"/> | <input type="radio"/> | <input type="radio"/> | <input type="radio"/> |

\* 33. In your opinion, how important to your job satisfaction is it for you to be seen by patients as part of the clinical care team?

| Not important                                                                     | Less important                                                                    | Moderately important                                                              | Important                                                                           | Very important                                                                      |
|-----------------------------------------------------------------------------------|-----------------------------------------------------------------------------------|-----------------------------------------------------------------------------------|-------------------------------------------------------------------------------------|-------------------------------------------------------------------------------------|
|  |  |  |  |  |

Comment

\* 34. Do you feel that lack of visibility to patients is a risk to radiology as a profession?

- Yes
- No

Comment

\* 35. Do you regularly communicate with patients clinically (face to face) in your practice?

- Yes
- No

What is the identity and role of the radiologist in 2020?

IF YES (I do regularly communicate with patients face to face)

\* 36. Do you see patients face to face?

|                                | Yes                   | No                    |
|--------------------------------|-----------------------|-----------------------|
| In ultrasound?                 | <input type="radio"/> | <input type="radio"/> |
| For interventional procedures? | <input type="radio"/> | <input type="radio"/> |
| In MR or CT unit?              | <input type="radio"/> | <input type="radio"/> |
| To go through imaging results? | <input type="radio"/> | <input type="radio"/> |

Other (please comment)

\* 37. Do you typically have sufficient time to discuss the procedure with the patient?

- Yes
- No
- Not applicable

\* 38. Do you typically have sufficient time to discuss the radiology findings with the patient?

- Yes
- Sometimes
- Usually not
- Not applicable

\* 39. Do you have specific time for this in your job plan or is it not reimbursed (or provided for) in your system?

- Yes
- No
- Not applicable

Other (please comment)

\* 40. Is there a specific/dedicated clinic room available in your department to discuss radiology findings?

- Yes - highly adequate
- Yes - not really adequate
- No
- Not applicable

\* 41. Do you think it would be useful to be in the outpatient clinic or clinical department together with the clinicians to go through images with the patient?

- Yes
- No

What is the identity and role of the radiologist in 2020?

42. If no, why not? Please indicate briefly in comment box.

What is the identity and role of the radiologist in 2020?

\* 43. Do you think a trained radiological assistant (radiographer or radiology nurse) could help to describe procedure with the patient in order to improve patient experience as well as efficiency?

- Yes
- No

Comment

What is the identity and role of the radiologist in 2020?

IF NO (I do not regularly communicate with patients face to face

\* 44. If you do not typically see/communicate with patients face to face (e.g. mainly reporting on PACS), would you prefer seeing the patients more and discussing their images/findings with them?

- Yes
- No

What is the identity and role of the radiologist in 2020?

\* 45. If not, would you prefer not to see patients because:

|                                              | Yes                   | No                    |
|----------------------------------------------|-----------------------|-----------------------|
| Too time consuming                           | <input type="radio"/> | <input type="radio"/> |
| This would not be reimbursed                 | <input type="radio"/> | <input type="radio"/> |
| I think the clinician should give the result | <input type="radio"/> | <input type="radio"/> |

Comment

What is the identity and role of the radiologist in 2020?

\* 46. Do you think providing the findings directly to the patient would be beneficial?

- Yes
- No

Comment

\* 47. Do you think providing the findings directly to the patient would be harmful?

- Yes
- No

Comment

## What is the identity and role of the radiologist in 2020?

\* 48. If yes, why?

- Could be distressing
- No relationship with patient
- Not able to discuss onward treatment therefore patient is left wondering what will happen
- Other (please comment)

## What is the identity and role of the radiologist in 2020?

\* 49. Have you had any formal patient communication training?

- Yes
- No

\* 50. Do you think that radiologists should be given formal communication training, customised to the radiology setting? (*considering that the radiologist may have limited time in the e.g. ultrasound list, they cannot go into detail with patients but perhaps should have training in "catching" the patients first shock, preparing patient for the next steps but also finding a way that makes it easier for radiologists to know how to deal with delivering bad news?*)

- Yes, radiologists should undertake formal communication training
- No, I do not think this is necessary

## What is the identity and role of the radiologist in 2020?

\* 51. If yes, should radiologists be given formal communication training for:

|                                                    | Yes                   | No                    |
|----------------------------------------------------|-----------------------|-----------------------|
| For communication of bad news                      | <input type="radio"/> | <input type="radio"/> |
| For communication of significant imaging findings: | <input type="radio"/> | <input type="radio"/> |

## What is the identity and role of the radiologist in 2020?

\* 52. How are diagnostic findings (“non-distressing” for example non-life limiting conditions such as gallstones or degenerative joint) provided to the patient in your institution?

|                                           | Never                 | Sometimes             | Often                 | Usually               |
|-------------------------------------------|-----------------------|-----------------------|-----------------------|-----------------------|
| To patient in the department face to face | <input type="radio"/> | <input type="radio"/> | <input type="radio"/> | <input type="radio"/> |
| Via email to the patient                  | <input type="radio"/> | <input type="radio"/> | <input type="radio"/> | <input type="radio"/> |
| Via secure patient portal                 | <input type="radio"/> | <input type="radio"/> | <input type="radio"/> | <input type="radio"/> |
| To referring clinician                    | <input type="radio"/> | <input type="radio"/> | <input type="radio"/> | <input type="radio"/> |

Comment

\* 53. In your opinion, how would you prefer to provide “non-distressing” patient findings?

|                                           | Never                 | Sometimes             | Often                 | Usually               |
|-------------------------------------------|-----------------------|-----------------------|-----------------------|-----------------------|
| To patient in the department face to face | <input type="radio"/> | <input type="radio"/> | <input type="radio"/> | <input type="radio"/> |
| Via email to the patient                  | <input type="radio"/> | <input type="radio"/> | <input type="radio"/> | <input type="radio"/> |
| Via secure patient portal                 | <input type="radio"/> | <input type="radio"/> | <input type="radio"/> | <input type="radio"/> |
| To referring clinician                    | <input type="radio"/> | <input type="radio"/> | <input type="radio"/> | <input type="radio"/> |

Comment

\* 54. Does your department undertake patient feedback questionnaires?

- Yes  
 No  
 I don't know

Comment

## What is the identity and role of the radiologist in 2020?

\* 55. What role do you think radiologists should have in letting patients know about radiological errors or discrepancies?

- We should have opportunities to discuss directly with patient
- This should be done by the patients' clinical doctor
- This should be done together by radiologist and clinician
- No such communication should take place
- Comment

\* 56. In your opinion, how important is communicating errors in connection with your role as a radiologist?

Not important

Less important

Moderately important

Important

Very important

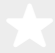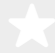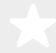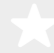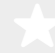

Comment

## What is the identity and role of the radiologist in 2020?

### Interaction with clinicians

\* 57. Do you feel part of one or more particular 'clinical team' such as a specialist service (e.g. Gastrointestinal cancer, neuro, musculoskeletal etc).

- Yes
- Somewhat
- No

\* 58. In your opinion, do your clinical colleagues think of you as being part of their clinical team?

- Yes
- Somewhat
- No



\* 59. Do you regularly provide face to face or telephone opinions to your clinical colleagues?

- Yes
- No

What is the identity and role of the radiologist in 2020?

\* 60. If yes, how important is this to your practice?

Not important      Less important      Moderately important      Important      Very important

★      ★      ★      ★      ★

What is the identity and role of the radiologist in 2020?

\* 61. If not, how important do you think this could be to your practice?

Not important      Less important      Moderately important      Important      Very important

★      ★      ★      ★      ★

What is the identity and role of the radiologist in 2020?

\* 62. Do you have regular formally scheduled weekly meetings (eg, multidisciplinary case reviews, tumour boards) with the clinical colleagues?

- Yes
- No

What is the identity and role of the radiologist in 2020?

63. If you do not have regular weekly meetings with the clinical colleagues, what is the reason?

- No time to attend due to heavy workload
- Not reimbursed
- Other (please comment)

### What is the identity and role of the radiologist in 2020?

\* 64. If yes, in which form?

- In the form of tumour board/ multi-disciplinary team meetings
- Informal
- Both (tumour boards/ multi-disciplinary team meetings and informal)

\* 65. How important are these to your practice?

|               |                |                      |           |                |
|---------------|----------------|----------------------|-----------|----------------|
| Not important | Less important | Moderately important | Important | Very important |
| ★             | ★              | ★                    | ★         | ★              |

\* 66. In which form are multidisciplinary meetings recognised by your hospital/ department management as an essential part of the radiologists' work?

|                                                                               | Yes                   | No                    |
|-------------------------------------------------------------------------------|-----------------------|-----------------------|
| Adequate time provided for preparation and review of external images?         | <input type="radio"/> | <input type="radio"/> |
| Adequate staffing and subspecialist competence (level III training) provided? | <input type="radio"/> | <input type="radio"/> |
| Regularly reimbursed service in the budget?                                   | <input type="radio"/> | <input type="radio"/> |

### What is the identity and role of the radiologist in 2020?

\* 67. Do you see your role as important in integrating information about the patient (clinical, imaging, pathology, outcome, follow-up)?

- Yes: I do this already
- Yes: I would like to do this more
- No: I do not think this is the role of the radiologist

\* 68. Are you a sub-specialist interventional radiologist?

- Yes
- No

## What is the identity and role of the radiologist in 2020?

### In relation to interventional procedures

69. Who typically decides on the procedure in your department?

- Radiologist
- Referring clinician
- Together

70. In your department, do you feel you work more as a

|            | Strongly disagree     | Disagree              | Neutral               | Agree                 | Strongly agree        |
|------------|-----------------------|-----------------------|-----------------------|-----------------------|-----------------------|
| Clinician  | <input type="radio"/> | <input type="radio"/> | <input type="radio"/> | <input type="radio"/> | <input type="radio"/> |
| Technician | <input type="radio"/> | <input type="radio"/> | <input type="radio"/> | <input type="radio"/> | <input type="radio"/> |

71. Do you feel that less experienced Interventional Radiology (IR) practitioners may at times feel under pressure to perform a procedure if the referring clinician wants it?

| Strongly disagree     | Disagree              | Neutral               | Agree                 | Strongly agree        |
|-----------------------|-----------------------|-----------------------|-----------------------|-----------------------|
| <input type="radio"/> | <input type="radio"/> | <input type="radio"/> | <input type="radio"/> | <input type="radio"/> |

72. Would you like to have your own outpatient clinic?

- I have one
- Yes, I would like to have one
- No

73. Do you have radiology day case or in-patient beds available for your use?

|                 | Not available but <i>would not like</i> | Not available but <i>would like to have</i> | Already available     |
|-----------------|-----------------------------------------|---------------------------------------------|-----------------------|
| Day case beds   | <input type="radio"/>                   | <input type="radio"/>                       | <input type="radio"/> |
| In patient beds | <input type="radio"/>                   | <input type="radio"/>                       | <input type="radio"/> |

74. In your department are there junior Interventional Radiology (IR) trainees who are training to become sub-specialty IR radiologists?

- Yes  
 No

### What is the identity and role of the radiologist in 2020?

#### About your role in education, research, management and service development

\* 75. In your job, who do you provide training to:

|                                                     | Not important role    | Less important role   | Moderately important  | Important role        | Very important role   |
|-----------------------------------------------------|-----------------------|-----------------------|-----------------------|-----------------------|-----------------------|
| Medical students                                    | <input type="radio"/> | <input type="radio"/> | <input type="radio"/> | <input type="radio"/> | <input type="radio"/> |
| Doctors in training (non-radiologists)              | <input type="radio"/> | <input type="radio"/> | <input type="radio"/> | <input type="radio"/> | <input type="radio"/> |
| Radiographers                                       | <input type="radio"/> | <input type="radio"/> | <input type="radio"/> | <input type="radio"/> | <input type="radio"/> |
| Radiologists in training (level I and II)           | <input type="radio"/> | <input type="radio"/> | <input type="radio"/> | <input type="radio"/> | <input type="radio"/> |
| Radiologists in sub specialist training (level III) | <input type="radio"/> | <input type="radio"/> | <input type="radio"/> | <input type="radio"/> | <input type="radio"/> |
| Nurses                                              | <input type="radio"/> | <input type="radio"/> | <input type="radio"/> | <input type="radio"/> | <input type="radio"/> |
| Other para-medical staff                            | <input type="radio"/> | <input type="radio"/> | <input type="radio"/> | <input type="radio"/> | <input type="radio"/> |

\* 76. Did you receive any formal training to teach?

- Yes  
 No

\* 77. How important do you think formal teacher training is?

|               |                |                      |           |                |
|---------------|----------------|----------------------|-----------|----------------|
| Not important | Less important | Moderately important | Important | Very important |
| ★             | ★              | ★                    | ★         | ★              |

Comment

\* 78. Do you think that a teaching role improves the visibility and identity of radiologists?

|                        |                       |                       |                       |                       |                       |
|------------------------|-----------------------|-----------------------|-----------------------|-----------------------|-----------------------|
|                        | Strongly disagree     | Disagree              | Neutral               | Agree                 | Strongly agree        |
| To the institution     | <input type="radio"/> | <input type="radio"/> | <input type="radio"/> | <input type="radio"/> | <input type="radio"/> |
| To clinical colleagues | <input type="radio"/> | <input type="radio"/> | <input type="radio"/> | <input type="radio"/> | <input type="radio"/> |
| To patients            | <input type="radio"/> | <input type="radio"/> | <input type="radio"/> | <input type="radio"/> | <input type="radio"/> |
| To public              | <input type="radio"/> | <input type="radio"/> | <input type="radio"/> | <input type="radio"/> | <input type="radio"/> |

\* 79. Do you think radiological training should include a brief training on Artificial Intelligence (AI) computing technology and/or software engineering skills?

- Yes - Basic training (understanding concepts) should be included in core curriculum.
- Yes - Advanced training (ability to undertake) focussed on radiologists should be available
- No

## What is the identity and role of the radiologist in 2020?

With regards to research

\* 80. What is your level of interest in taking part in radiological research?

|             |              |        |               |                    |
|-------------|--------------|--------|---------------|--------------------|
| No interest | Low interest | Medium | High interest | Very high interest |
| ★           | ★            | ★      | ★             | ★                  |

\* 81. Are there opportunities to take part in research in your dept.?

|                  |        |        |         |                    |
|------------------|--------|--------|---------|--------------------|
| No opportunities | Little | Enough | Several | Many opportunities |
| ★                | ★      | ★      | ★       | ★                  |

\* 82. Would you like more opportunities to contribute to data collection for research but not lead research?

- No
- Perhaps
- Yes

\* 83. In your opinion, is research led by radiologists important to our identity as a profession?

|               |                |                      |           |                |
|---------------|----------------|----------------------|-----------|----------------|
| Not important | Less important | Moderately important | Important | Very important |
| ★             | ★              | ★                    | ★         | ★              |

\* 84. Research led by radiologists improves the visibility and identity of radiologists

|                        | Totally disagree      | Disagree              | Neutral               | Agree                 | Totally agree         |
|------------------------|-----------------------|-----------------------|-----------------------|-----------------------|-----------------------|
| To clinical colleagues | <input type="radio"/> | <input type="radio"/> | <input type="radio"/> | <input type="radio"/> | <input type="radio"/> |
| To patients            | <input type="radio"/> | <input type="radio"/> | <input type="radio"/> | <input type="radio"/> | <input type="radio"/> |
| To media               | <input type="radio"/> | <input type="radio"/> | <input type="radio"/> | <input type="radio"/> | <input type="radio"/> |

\* 85. In your opinion, do you think research should be part of radiology training?

|                                                         | Strongly disagree     | Disagree              | Neutral               | Agree                 | Strongly agree        |
|---------------------------------------------------------|-----------------------|-----------------------|-----------------------|-----------------------|-----------------------|
| Basic understanding<br>(methods, statistics and ethics) | <input type="radio"/> | <input type="radio"/> | <input type="radio"/> | <input type="radio"/> | <input type="radio"/> |
| Direct involvement in a<br>research project             | <input type="radio"/> | <input type="radio"/> | <input type="radio"/> | <input type="radio"/> | <input type="radio"/> |

What is the identity and role of the radiologist in 2020?

Management-related questions with regards to your institution

\* 86. Is the head of radiology departments included in the Hospital Management / Medical Board?

- Yes
- No
- Not automatically, but in some instances
- I don't know

\* 87. Do radiologists have opportunities to develop senior management roles to influence patient treatment pathway?

|                   |          |         |       |                |
|-------------------|----------|---------|-------|----------------|
| Strongly disagree | Disagree | Neutral | Agree | Strongly agree |
| ★                 | ★        | ★       | ★     | ★              |

\* 88. Do radiologists have opportunities to develop senior management roles to influence institutional development?

|                   |          |         |       |                |
|-------------------|----------|---------|-------|----------------|
| Strongly disagree | Disagree | Neutral | Agree | Strongly agree |
| ★                 | ★        | ★       | ★     | ★              |

\* 89. Do radiologists have opportunities to develop new diagnostic services?

|                   |          |         |       |                |
|-------------------|----------|---------|-------|----------------|
| Strongly disagree | Disagree | Neutral | Agree | Strongly agree |
| ★                 | ★        | ★       | ★     | ★              |

\* 90. Do radiologists have opportunities, with clinical colleagues, to develop new therapeutic services?

|                   |          |         |       |                |
|-------------------|----------|---------|-------|----------------|
| Strongly disagree | Disagree | Neutral | Agree | Strongly agree |
| ★                 | ★        | ★       | ★     | ★              |

\* 91. How much discretion do radiologists have in your department to purchase equipment?

- Full control
- Advisory role only
- No input (decisions made by others)

### What is the identity and role of the radiologist in 2020?

92. Would you like to answer the optional section "Areas of delegation: What happens in your department and what is your opinion" (13 more questions) or proceed to the end to submit your answers?

- Proceed to the optional section "Areas of delegation"
- Proceed to the end to submit answers

### What is the identity and role of the radiologist in 2020?

Areas of delegation: What happens in your department and what is your opinion? (Optional section)

**In this section, we would like to know your opinion on the delegation of some roles traditionally reserved for radiologists to other allied professionals.**

93. In your department do radiographers typically:

|                                                                        | Yes                   | No                    |
|------------------------------------------------------------------------|-----------------------|-----------------------|
| Check for allergies/renal function?                                    | <input type="radio"/> | <input type="radio"/> |
| Go through patient safety checklist for non-interventional CT and MRI? | <input type="radio"/> | <input type="radio"/> |
| Explain the contrast injection and potential risks?                    | <input type="radio"/> | <input type="radio"/> |
| Explain the radiation exposure and potential risk?                     | <input type="radio"/> | <input type="radio"/> |
| Obtain informed consent for cross-sectional imaging?                   | <input type="radio"/> | <input type="radio"/> |
| Perform ultrasonography?                                               | <input type="radio"/> | <input type="radio"/> |
| Perform venous access?                                                 | <input type="radio"/> | <input type="radio"/> |
| Assess image quality autonomously before ending a CT examination?      | <input type="radio"/> | <input type="radio"/> |
| Assess image quality autonomously in order to end a MR examination?    | <input type="radio"/> | <input type="radio"/> |
| Assess whether or not it is justified to end/ cancel an examination?   | <input type="radio"/> | <input type="radio"/> |

94. In your department currently, is **vetting** (checking if the indication is appropriate) of radiology requests always done by an accredited radiologist or is there some delegation to trained radiographic staff?

|                               | Only radiologist      | May be delegated to trained radiographer |
|-------------------------------|-----------------------|------------------------------------------|
| Plain film                    | <input type="radio"/> | <input type="radio"/>                    |
| Ultrasound (US)               | <input type="radio"/> | <input type="radio"/>                    |
| CT                            | <input type="radio"/> | <input type="radio"/>                    |
| MRI                           | <input type="radio"/> | <input type="radio"/>                    |
| Nuclear Medicine              | <input type="radio"/> | <input type="radio"/>                    |
| Interventional Radiology (IR) | <input type="radio"/> | <input type="radio"/>                    |



95. If radiographers undertake some vetting in your department, do you think the training for this should be formally regulated/certified?

- Yes
- No
- Not applicable

96. What risks do you perceive related to non-radiologist vetting?

|                                | Low                   | Moderate              | High                  |
|--------------------------------|-----------------------|-----------------------|-----------------------|
| Repeat examination too soon    | <input type="radio"/> | <input type="radio"/> | <input type="radio"/> |
| Un-necessary investigation     | <input type="radio"/> | <input type="radio"/> | <input type="radio"/> |
| Wrong investigation            | <input type="radio"/> | <input type="radio"/> | <input type="radio"/> |
| Inappropriate CT/ MRI protocol | <input type="radio"/> | <input type="radio"/> | <input type="radio"/> |

97. In your department currently, is **selection of imaging protocol** of radiology requests always done by an accredited radiologist or is there some delegation to trained radiographic staff?

|                               | Only radiologist      | May be delegated to trained radiographer | Not done              |
|-------------------------------|-----------------------|------------------------------------------|-----------------------|
| Plain film                    | <input type="radio"/> | <input type="radio"/>                    | <input type="radio"/> |
| Ultrasound (US)               | <input type="radio"/> | <input type="radio"/>                    | <input type="radio"/> |
| CT                            | <input type="radio"/> | <input type="radio"/>                    | <input type="radio"/> |
| MRI                           | <input type="radio"/> | <input type="radio"/>                    | <input type="radio"/> |
| Nuclear Medicine              | <input type="radio"/> | <input type="radio"/>                    | <input type="radio"/> |
| Interventional Radiology (IR) | <input type="radio"/> | <input type="radio"/>                    | <input type="radio"/> |

98. Are radiographers in your department trained in terminology related to anatomy and pathology?

- Yes
- No

99. Do allied professionals (radiographers) issue imaging reports in your department?

- Yes
- Limited reporting
- Never

100. Do you agree with this in principle?

- Yes
- No

101. Who should have final decision of whether reporting radiographer is acceptable in department?

- Head of department(radiologist or other medically trained head of radiology)?
- Hospital management team?

102. What level of performance metric do you think would be acceptable for radiographic reporting?

- Audited findings within the same range as between two expert radiologists
- Audited findings within 10% of expert radiologist
- Audited findings within the same range as training radiologist
- Not applicable

103. Who should take responsibility for significant errors in radiographic reports?

- Radiographer
- Hospital management
- Radiologists

104. What do you perceive are the drivers for radiographer skill-mix/delegation?

|                                                                                                             | Strongly disagree     | Disagree              | Neutral               | Agree                 | Strongly agree        | Not applicable / I don't know |
|-------------------------------------------------------------------------------------------------------------|-----------------------|-----------------------|-----------------------|-----------------------|-----------------------|-------------------------------|
| Retention of excellent staff by increasing opportunities for professional development                       | <input type="radio"/> | <input type="radio"/> | <input type="radio"/> | <input type="radio"/> | <input type="radio"/> | <input type="radio"/>         |
| Retention of staff by increasing responsibility and therefore pay enhancement/ improved professional status | <input type="radio"/> | <input type="radio"/> | <input type="radio"/> | <input type="radio"/> | <input type="radio"/> | <input type="radio"/>         |
| Work-load pressure on radiologists                                                                          | <input type="radio"/> | <input type="radio"/> | <input type="radio"/> | <input type="radio"/> | <input type="radio"/> | <input type="radio"/>         |
| Insufficient provision of radiologist numbers                                                               | <input type="radio"/> | <input type="radio"/> | <input type="radio"/> | <input type="radio"/> | <input type="radio"/> | <input type="radio"/>         |
| Backlog reporting                                                                                           | <input type="radio"/> | <input type="radio"/> | <input type="radio"/> | <input type="radio"/> | <input type="radio"/> | <input type="radio"/>         |

Others (please comment)

105. What do you see as the main disadvantages of reporting by radiographers?

- De-skilling of junior radiologists/leading to de-skilling in the longer term - e.g. in plain film reporting
- The need to train radiographers and ensure quality metrics are met/audit
- Reports are not actionable - may end up being re-scanned or re-reported by radiologist
- May create more work - e.g. gynae ultrasound scanning in general practitioner's (GP) clinics led to huge increase in MRI of simple cysts/non worrisome cysts - as the sonographer was not confident to call benign (unintended consequences)
- Less radiologists trained
- The fact that radiographer reports are not provided by someone with full medical training
- Other (please comment)

What is the identity and role of the radiologist in 2020?

**Thank you very much for your time!**

**Please select Previous to go back to the survey or Done to submit your replies.**
